# Supplementary material for: Consent to minimally invasive tissue sampling procedures in children in Mozambique: A mixed-methods study
Source: PLoS One. 2021 Nov 8;16(11):e0259621. doi: 10.1371/journal.pone.0259621 (PMC8575303; doi:10.1371/journal.pone.0259621)
Supplement: S1 Appendix — (PDF) [file pone.0259621.s001.pdf]

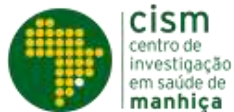

*Centro de Investigação em Saúde da Manhã (CISM)*

**ESTUDO DE VIABILIDADE E ACEITABILIDADE CADMIA**

**GUIÃO DE ENTREVISTA PARA FAMILIARES  
DE UM FALECIDO A 0-24 HORAS APÓS DA MORTE**

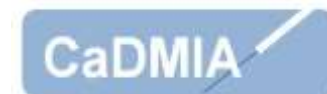

## Instruções

1. Apresente-se e dê as condolências.
2. Explique que:
  - Esta entrevista tem como objectivo explorar a sua experiencia recente com a morte e a sua opinião sobre a realização de MIAs (biopsias/colheita de amostras).
  - Foi convidado/a para esta entrevista porque a sua contribuição é essencial para entender o fenómeno da morte desde a perspectiva da família.
  - Vamos falar de questões relacionadas com a causa de morte e a possibilidade de realizar MIAs a entes-queridos. Espera-se que a entrevista dure 10-15 minutos.
3. Diga que, se permitir, a entrevista será gravada, somente para não correremos o risco de perdermos informação importante que for a dar durante a entrevista. Caso não aceite que seja gravada, você deverá tomar notas enquanto decorre a conversa.
4. Diga também que, irá tomar notas ao longo da discussão para garantir a segurança da informação. Toda a informação gravada será confidencial e você não será identificado pelo seu nome.

Entrevistador(a) |\_\_|\_\_| Data: |\_\_|\_\_|-|\_\_|\_\_|-|\_\_|\_\_| Nr. Estudo: |\_\_|\_\_|-CaDMIA- FAM 0a24h -|\_\_|\_\_|\_\_|-|\_\_|\_\_|\_\_|

### INFORMAÇÃO DEMOGRÁFICA

|                                                   |                                                                                                                                                                                                                                    |                                            |
|---------------------------------------------------|------------------------------------------------------------------------------------------------------------------------------------------------------------------------------------------------------------------------------------|--------------------------------------------|
| <b>Ref. Ficheiro Áudio /<br/>Número de estudo</b> | __ __ -CaDMIA-FAM 0a24h - __ __ __ - __ __ __                                                                                                                                                                                      |                                            |
| <b>Dados do participante</b>                      | Sexo  __  Idade  __ __ <br>Nível escolaridade: _____ Ocupação: _____<br>Religião: _____<br>Categoria de respondente, em relação ao falecido: _____<br>(Ex: Mãe/Pai, Esposa/Esposo, Filho, Tio, Outro)                              |                                            |
| <b>Dados do falecido</b>                          | Sexo  __  Idade  __ __  M. Grávida <input type="checkbox"/> Criança< 3meses <input type="checkbox"/> Nado Morto <input type="checkbox"/><br>Religião: _____<br>Data da morte:  __ __ - __ __ - __ __  Hora da morte:  __ __: __ __ |                                            |
| <b>Data e local da entrevista</b>                 | __ __ - __ __ - __ __  _____                                                                                                                                                                                                       |                                            |
| <b>Línguas faladas</b>                            | _____                                                                                                                                                                                                                              |                                            |
| <b>Resultado da entrevista</b>                    | <input type="checkbox"/> Completa <input type="checkbox"/> Interrompida <input type="checkbox"/> Impossível de completar<br>Razões: _____                                                                                          | Por completar a:<br> __ __ - __ __ - __ __ |

Entrevistador(a) |\_|\_| Data: |\_|\_|-|\_|\_|-|\_|\_| Nr. Estudo: |\_|\_|-CaDMIA- FAM 0a24h -|\_|\_|\_|-|\_|\_|\_|

## 1. CAUSA DE MORTE

| O que aconteceu? [O que causou a morte do seu familiar?]                                                                                                                                                                                                                                                                                | RESUMO |
|-----------------------------------------------------------------------------------------------------------------------------------------------------------------------------------------------------------------------------------------------------------------------------------------------------------------------------------------|--------|
| <p><b>Acha que é importante saber a causa de morte do seu familiar? Porquê?</b></p> <p>→Pergunte quais seriam as vantagens de conhecer as causas da morte. Pergunte também as desvantagens.</p> <p>→ Explore emoções: por exemplo, si saber a causa de morte faria/faz que a pessoa esteja mais tranquila, ou mais preocupada, etc.</p> |        |

Entrevistador(a) |\_|\_| Data: |\_|\_|-|\_|\_|-|\_|\_| Nr. Estudo: |\_|\_|-CaDMIA- FAM 0a24h -|\_|\_|\_|-|\_|\_|\_|

## 2. MIAS

Se aqui na Manhiça (*área do estudo*) houvera uma maneira de determinar a causa de morte tirando amostra como lhe expliquei no consentimento informado (biopsia/MIA), aceitaria ou rejeitaria fazer ao seu familiar? Porquê?

Imagine que as MIAs estão a ser feitas aqui na Manhiça. Se fora um médico ou um profissional da saúde a pedir, aceitaria? Porquê?

O é que a saúde poderia fazer para facilitar para que o procedimento não prejudicasse o ritmo normal das cerimónias e para que a família não se sentisse lesada?

## RESUMO

Entrevistador(a) |\_|\_| Data: |\_|\_|-|\_|\_|-|\_|\_| Nr. Estudo: |\_|\_|-CaDMIA- FAM 0a24h -|\_|\_|\_|-|\_|\_|\_|

### 3. O QUÉ ACONTECE QUANDO MORRE ALGUÉM?

| O quê estão a tratar neste momento? | RESUMO |
|-------------------------------------|--------|
|                                     |        |

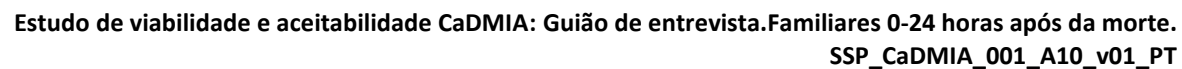

### OBSERVAÇÕES

This image shows a single sheet of white paper with horizontal ruling lines. The lines are evenly spaced and run across the width of the page. There are no margins, text, or other markings on the paper.
