# Supplementary material for: Consent to minimally invasive tissue sampling procedures in children in Mozambique: A mixed-methods study
Source: PLoS One. 2021 Nov 8;16(11):e0259621. doi: 10.1371/journal.pone.0259621 (PMC8575303; doi:10.1371/journal.pone.0259621)
Supplement: S4 Appendix — (PDF) [file pone.0259621.s004.pdf]

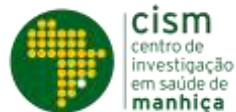

**CENTRO DE INVESTIGAÇÃO EM SAÚDE DE MANHIÇA (CISM)**  
**Avaliação das Percepções da Comunidade e Viabilidade de um Programa**  
**de Vigilância de Mortalidade Neonatal e Infantil no Distrito de Manhica**  
**(Estudo CHAMPS-SBS)**  
**Stage 2**  
**GUIÃO DE ENTREVISTA SEMI-ESTRUTURADA**  
**Familiares de crianças falecidas que recusaram a realização da MITS**

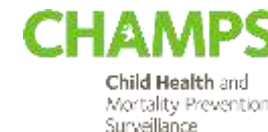

## Instruções

1. Explique ao entrevistado que:
  - Esta entrevista tem como objectivo conversar com os participantes sobre CHAMPS e aspetos relacionados com a recolha de amostras de tecidos e fluidos no corpo de crianças recém-falecidas de forma minimamente invasiva (MITS).
  - Foi convidado (a) para esta entrevista porque devido a sua experiência recente com CHAMPS e MITS, a sua contribuição é essencial para entender os tópicos acima, desde a perspetiva da família.
  - Vamos iniciar a nossa conversa com questões relacionadas com o consentimento informado. Depois, vamos continuar com aspectos relacionados com a recolha de amostras de tecido e fluídos no corpo de crianças recém-falecidas. Finalmente vamos falar sobre a entrega dos resultados aos familiares das crianças falecidas e sobre a causa de morte da criança falecida. Espera-se que a entrevista dure 1h a 1h e 30 minutos.
2. Diga que, se permitir, a entrevista será gravada, somente para não correremos o risco de perdermos informação importante que for a dar durante a entrevista. Caso não aceite que seja gravada, o entrevistador tomará notas enquanto decorre a conversa.
3. Diga também que, irá tomar notas ao longo da conversa para garantir a segurança da informação. Toda a informação gravada será confidencial e você não será identificado (a) pelo seu nome.

## INFORMAÇÃO DEMOGRÁFICA

|                                           |                                                                                                                                                                                                                                                                                                                                                                                                             |                                                                                          |
|-------------------------------------------|-------------------------------------------------------------------------------------------------------------------------------------------------------------------------------------------------------------------------------------------------------------------------------------------------------------------------------------------------------------------------------------------------------------|------------------------------------------------------------------------------------------|
| Ref. Ficheiro Áudio /<br>Número do Estudo | CHAMPS_MZ_SSI_FM_ <input type="text"/> <input type="text"/><br>(ID arquivo) (ID do particip- N° e 3 letras)                                                                               |                                                                                          |
| Dados do participante                     | Sexo <input type="text"/> Idade <input type="text"/> <input type="text"/> Natural de (província e localidade): _____<br>_____<br>Mora em (P. Admin. e bairro): _____<br>Nível escolaridade (último nível concluído): _____<br>Ocupação _____ Estado civil _____<br>Religião e igreja: _____<br><b>Categoria do respondente em relação ao falecido</b> (Ex. mãe/pai, tio/a, avô/avó, irmão/irmã...)<br>_____ |                                                                                          |
| Dados do falecido                         | Sexo <input type="text"/> Idade <input type="text"/> <input type="text"/> _____<br>(dias/meses/anos)<br>Data da morte <input type="text"/> <input type="text"/> <input type="text"/> / <input type="text"/> <input type="text"/> <input type="text"/> / <input type="text"/> <input type="text"/> <input type="text"/> <input type="text"/>                                                                 | Nado morto <input type="text"/> Neonato <input type="text"/> Aborto <input type="text"/> |
| Data e local da entrevista                | _ _ - _ _ - _ _ _ _ _  _____                                                                                                                                                                                                                                                                                                                                                                                |                                                                                          |
| Línguas faladas                           | _____                                                                                                                                                                                                                                                                                                                                                                                                       |                                                                                          |
| Resultado da entrevista                   | Gravada <input type="text"/> Não gravada <input type="text"/> Motivo: _____<br>_____<br>Completa <input type="text"/> Interrompida <input type="text"/> Motivo: _____<br>_____                                                                                                                                                                                                                              | Impossível de completar <input type="text"/><br>Por completar em (data): _____<br>_____  |
| Entrevistador:  _ _ _ _                   |                                                                                                                                                                                                                                                                                                                                                                                                             |                                                                                          |

**1. MITS**

1 . O que acha sobre o pedido de consentimento que foi feito para realização da MITS na criança falecida? Porquê?

Explore o que o entrevistado acha sobre:

- ➔ A forma como foi realizado o pedido de consentimento?
- ➔ A melhor forma de pedir o consentimento?
- ➔ O momento em que se pede/pediu o consentimento?
- ➔ A pessoa que pede ou pediu o consentimento?
- ➔ Se o pedido foi feito a pessoa certa?

2. Como é que se chegou à decisão de recusarem a realização da MITS?

Explore:

- ➔ Pessoas envolvidas?
- ➔ Pessoas que tiveram a última palavra?
- ➔ Dificuldades para tomar a decisão?
- ➔ Motivos que lhes levaram a recusar MITS?

**RESUMO**

3. De que forma a acha que a realização de MITS teria interferido no programa para realização do funeral da criança falecida?

Explore:

- ➔ Que programas ou cerimónias teriam sido mais afectados?

4. Aconselharia uma família que perdeu uma criança a realizar a MITS? Porquê?

Explore:

- ➔ O que poderia dizer a família como um conselho para aceitar realizar a MITS?

5. O que acha sobre realizar MITS em casa ou num outro sítio na sua comunidade?

Explore o que o entrevistado acha sobre:

- ➔ Pessoas da comunidade assistirem a realização da MITS? Que pessoas da comunidade poderiam ser envolvidas?
- ➔ Barreiras e dificuldades?

**2. ENTREGA DE RESULTADOS DAS MITS**

|                                                                                                                                                                                                                                                                                                                                                                                                                                                                                               |                      |
|-----------------------------------------------------------------------------------------------------------------------------------------------------------------------------------------------------------------------------------------------------------------------------------------------------------------------------------------------------------------------------------------------------------------------------------------------------------------------------------------------|----------------------|
| <p>1. Se tivesse aceite realizar MITS na criança falecida, como CHAMPS deveria fazer a entrega dos resultados?</p> <p>Explore o que o entrevistado acha sobre:</p> <ul style="list-style-type: none"> <li>➔ O tempo que a família poderia esperar para receber os resultados?</li> <li>➔ A forma como a família devia ser contactado e informado?</li> <li>➔ Pessoas que seriam envolvidas na divulgação dos resultados?</li> <li>➔ Dificuldades e barreiras para fazer a entrega?</li> </ul> | <p><b>RESUMO</b></p> |
|-----------------------------------------------------------------------------------------------------------------------------------------------------------------------------------------------------------------------------------------------------------------------------------------------------------------------------------------------------------------------------------------------------------------------------------------------------------------------------------------------|----------------------|

**3 . Causa da morte**

|                                                                                                                                                                                                                                                                                                                                                                                                                                                          |                      |
|----------------------------------------------------------------------------------------------------------------------------------------------------------------------------------------------------------------------------------------------------------------------------------------------------------------------------------------------------------------------------------------------------------------------------------------------------------|----------------------|
| <p>1. Preocupou-se em procurar saber da causa da morte da criança? Porquê?</p> <p>Explore:</p> <ul style="list-style-type: none"> <li>➔ Aonde é que procurou saber da causa da morte?</li> <li>➔ Depois de quanto tempo ter ocorrido a morte da criança?</li> <li>➔ Quem são as pessoas que tomaram essa decisão?</li> <li>➔ O que acha da causa de morte que descobriu?</li> <li>➔ Dificuldades encontradas para descobrir a causa de morte?</li> </ul> | <p><b>RESUMO</b></p> |
|----------------------------------------------------------------------------------------------------------------------------------------------------------------------------------------------------------------------------------------------------------------------------------------------------------------------------------------------------------------------------------------------------------------------------------------------------------|----------------------|

---

---

---

---

---

---

## This image shows a single sheet of white paper with horizontal ruling lines. The lines are evenly spaced and run across the width of the page. There are no margins or other markings on the paper.
